# Supplementary material for: Microbial diversity of extreme habitats in human homes
Source: PubMed Central journal article supplement (PMC5028791; doi:10.7717/peerj.2376), 2016-09-13
Supplement: peerj-04-2376-s003.pdf [file peerj-04-2376-s003.pdf]

Supp. Table 4: List of non-human associated microbes in extreme and non-extreme (Dunn et al. 2013) home

| <b>Genus</b>            | <b>Dataset_Present</b> |
|-------------------------|------------------------|
| <i>Abiotrophia</i>      | Both                   |
| <i>Achromobacter</i>    | Both                   |
| <i>Aerococcus</i>       | Both                   |
| <i>Aeromicrobium</i>    | Both                   |
| <i>Agrobacterium</i>    | Both                   |
| <i>Alkanindiges</i>     | Both                   |
| <i>Alloiococcus</i>     | Both                   |
| <i>Amaricoccus</i>      | Both                   |
| <i>Ammoniphilus</i>     | Both                   |
| <i>Aquabacterium</i>    | Both                   |
| <i>Balneimonas</i>      | Both                   |
| <i>Bdellovibrio</i>     | Both                   |
| <i>Blastomonas</i>      | Both                   |
| <i>Bradyrhizobium</i>   | Both                   |
| <i>Burkholderia</i>     | Both                   |
| <i>Buttiauxella</i>     | Both                   |
| <i>Capnocytophaga</i>   | Both                   |
| <i>Carnobacterium</i>   | Both                   |
| <i>Catenibacterium</i>  | Both                   |
| <i>Caulobacter</i>      | Both                   |
| <i>Cellulomonas</i>     | Both                   |
| <i>Cellvibrio</i>       | Both                   |
| <i>Chroococciopsis</i>  | Both                   |
| <i>Chyrseobacterium</i> | Both                   |
| <i>Cohnella</i>         | Both                   |
| <i>Comamonas</i>        | Both                   |
| <i>Cupriavidus</i>      | Both                   |
| <i>Devosia</i>          | Both                   |
| <i>Dokdonella</i>       | Both                   |
| <i>Dyadobacter</i>      | Both                   |
| <i>Enterococcus</i>     | Both                   |
| <i>Erwinia</i>          | Both                   |
| <i>Exiguobacterium</i>  | Both                   |
| <i>Facklamia</i>        | Both                   |
| <i>Flavisolibacter</i>  | Both                   |
| <i>Flavobacterium</i>   | Both                   |
| <i>Flectobacillus</i>   | Both                   |
| <i>Fusobacterium</i>    | Both                   |
| <i>Gardnerella</i>      | Both                   |

|                         |      |
|-------------------------|------|
| <i>Gemmata</i>          | Both |
| <i>Geodermatophilus</i> | Both |
| <i>Gordonia</i>         | Both |
| <i>Helicobacter</i>     | Both |

|                          |      |
|--------------------------|------|
| <i>Hymenobacter</i>      | Both |
| <i>Hyphomicrobium</i>    | Both |
| <i>Janthinobacterium</i> | Both |
| <i>Jeotgalicoccus</i>    | Both |
| <i>Kaistobacter</i>      | Both |
| <i>Kineococcus</i>       | Both |
| <i>Lautropia</i>         | Both |
| <i>Leuconostoc</i>       | Both |
| <i>Limnohabitans</i>     | Both |
| <i>Luteibacter</i>       | Both |
| <i>Megamonas</i>         | Both |
| <i>Megasphaera</i>       | Both |
| <i>Methylibium</i>       | Both |
| <i>Methylobacterium</i>  | Both |
| <i>Methylopila</i>       | Both |
| <i>Methylotenera</i>     | Both |
| <i>Methyloversatilis</i> | Both |
| <i>Micrococcus</i>       | Both |
| <i>Microcoleus</i>       | Both |
| <i>Mobiluncus</i>        | Both |
| <i>Modestobacter</i>     | Both |
| <i>Moraxella</i>         | Both |
| <i>Nesterenkonia</i>     | Both |
| <i>Nitrospira</i>        | Both |
| <i>Novosphingobium</i>   | Both |
| <i>Paracoccus</i>        | Both |
| <i>Pediococcus</i>       | Both |
| <i>Pedobacter</i>        | Both |
| <i>Phenylobacterium</i>  | Both |
| <i>Planctomyces</i>      | Both |
| <i>Pseudoxanthomonas</i> | Both |
| <i>Psychrobacter</i>     | Both |
| <i>Rheinheimera</i>      | Both |
| <i>Rhizobium</i>         | Both |
| <i>Rhodobacter</i>       | Both |
| <i>Rhodococcus</i>       | Both |

|                         |      |
|-------------------------|------|
| <i>Rhodoplanes</i>      | Both |
| <i>Rothia</i>           | Both |
| <i>Rubellimicrobium</i> | Both |
| <i>Rubrivivax</i>       | Both |
| <i>Rubroacter</i>       | Both |
| <i>Salinicoccus</i>     | Both |
| <i>Schlegelella</i>     | Both |
| <i>Segetibacter</i>     | Both |
| <i>Sejonia</i>          | Both |
| <i>Shewanella</i>       | Both |
| <i>Skermanella</i>      | Both |

|                         |         |
|-------------------------|---------|
| <i>Sphingobacterium</i> | Both    |
| <i>Sphingobium</i>      | Both    |
| <i>Sphingomonas</i>     | Both    |
| <i>Sphingopyxis</i>     | Both    |
| <i>Spirosoma</i>        | Both    |
| <i>Sporosarcina</i>     | Both    |
| <i>Tepidimonas</i>      | Both    |
| <i>Thermomonas</i>      | Both    |
| <i>Thermus</i>          | Both    |
| <i>Varibaculum</i>      | Both    |
| <i>Wautersiella</i>     | Both    |
| <i>Weissella</i>        | Both    |
| <i>Yaniella</i>         | Both    |
| <i>Azobacteroides</i>   | Extreme |
| <i>Azospira</i>         | Extreme |
| <i>Brachybacterium</i>  | Extreme |
| <i>Brevundimonas</i>    | Extreme |
| <i>Brochothrix</i>      | Extreme |
| <i>Buchnera</i>         | Extreme |
| <i>Cetobacterium</i>    | Extreme |
| <i>Elizabethkingia</i>  | Extreme |
| <i>Enhydrobacter</i>    | Extreme |
| <i>Fimbriimonas</i>     | Extreme |
| <i>Gluconobacter</i>    | Extreme |
| <i>Helcococcus</i>      | Extreme |
| <i>Oligella</i>         | Extreme |
| <i>Parascardovia</i>    | Extreme |
| <i>Photobacterium</i>   | Extreme |
| <i>Polynucleobacter</i> | Extreme |

|                          |         |
|--------------------------|---------|
| <i>Propionibacterium</i> | Extreme |
| <i>Pseudoalteromonas</i> | Extreme |
| <i>Ralstonia</i>         | Extreme |
| <i>Salinibacterium</i>   | Extreme |
| <i>Solibacter</i>        | Extreme |
| <i>Thermicanus</i>       | Extreme |
| <i>Xiphinematobacter</i> | Extreme |
| <i>Acetobacter</i>       | Homes   |
| <i>Acidaminococcus</i>   | Homes   |
| <i>Acidiphilium</i>      | Homes   |
| <i>Acidocella</i>        | Homes   |
| <i>Acidovorax</i>        | Homes   |
| <i>Actinobaculum</i>     | Homes   |
| <i>Actinokineospora</i>  | Homes   |
| <i>Actinomadura</i>      | Homes   |
| <i>Actinoplanes</i>      | Homes   |
| <i>Aggregatibacter</i>   | Homes   |
| <i>Agromyces</i>         | Homes   |

|                         |       |
|-------------------------|-------|
| <i>Alcaligenes</i>      | Homes |
| <i>Alishewanella</i>    | Homes |
| <i>Alistipes</i>        | Homes |
| <i>Alkalibacterium</i>  | Homes |
| <i>Alloscardovia</i>    | Homes |
| <i>Amycolatopsis</i>    | Homes |
| <i>Anabaena</i>         | Homes |
| <i>Anaeromyxobacter</i> | Homes |
| <i>Anaerovorax</i>      | Homes |
| <i>Aphanizomenon</i>    | Homes |
| <i>Arcanobacterium</i>  | Homes |
| <i>Arthrobacter</i>     | Homes |
| <i>Arthronema</i>       | Homes |
| <i>Arthrospira</i>      | Homes |
| <i>Asaia</i>            | Homes |
| <i>Asticcacaulis</i>    | Homes |
| <i>Atopobium</i>        | Homes |
| <i>Aurantimonas</i>     | Homes |
| <i>Azohydromonas</i>    | Homes |
| <i>Azospirillum</i>     | Homes |
| <i>Bartonella</i>       | Homes |
| <i>Bergeyella</i>       | Homes |

|                           |       |
|---------------------------|-------|
| <i>Bordetella</i>         | Homes |
| <i>Bosea</i>              | Homes |
| <i>Brachymonas</i>        | Homes |
| <i>Brenneria</i>          | Homes |
| <i>Brevibacillus</i>      | Homes |
| <i>Caldilinea</i>         | Homes |
| <i>Calothrix</i>          | Homes |
| <i>Cardiobacterium</i>    | Homes |
| <i>Cellulosimicrobium</i> | Homes |
| <i>Chelativorans</i>      | Homes |
| <i>Chitinophaga</i>       | Homes |
| <i>Chthoniobacter</i>     | Homes |
| <i>Citrobacter</i>        | Homes |
| <i>Conchiformibius</i>    | Homes |
| <i>Crossiella</i>         | Homes |
| <i>Cryocola</i>           | Homes |
| <i>Cryptosporangium</i>   | Homes |
| <i>Curtobacterium</i>     | Homes |
| <i>Cystobacter</i>        | Homes |
| <i>Cytophaga</i>          | Homes |
| <i>Deinococcus</i>        | Homes |
| <i>Demequina</i>          | Homes |
| <i>Dermabacter</i>        | Homes |
| <i>Dermacoccus</i>        | Homes |
| <i>Dermatophilus</i>      | Homes |

|                         |       |
|-------------------------|-------|
| <i>Desemzia</i>         | Homes |
| <i>Desulfomicrobium</i> | Homes |
| <i>Desulfovibrio</i>    | Homes |
| <i>Dietzia</i>          | Homes |
| <i>Edaphobacter</i>     | Homes |
| <i>Eikenella</i>        | Homes |
| <i>Ensifer</i>          | Homes |
| <i>Enterobacter</i>     | Homes |
| <i>Epulopiscium</i>     | Homes |
| <i>Erythromicrobium</i> | Homes |
| <i>Eubacterium</i>      | Homes |
| <i>Filifactor</i>       | Homes |
| <i>Fluviicola</i>       | Homes |
| <i>Frankia</i>          | Homes |
| <i>Frateuria</i>        | Homes |

|                          |       |
|--------------------------|-------|
| <i>Gemella</i>           | Homes |
| <i>Gemmatimonas</i>      | Homes |
| <i>Geobacillus</i>       | Homes |
| <i>Geobacter</i>         | Homes |
| <i>Georgenia</i>         | Homes |
| <i>Gluconacetobacter</i> | Homes |
| <i>Granulicatella</i>    | Homes |
| <i>Haloanella</i>        | Homes |
| <i>Halomonas</i>         | Homes |
| <i>Herpetosiphon</i>     | Homes |
| <i>Hylemonella</i>       | Homes |
| <i>Iamia</i>             | Homes |
| <i>Ignatzschineria</i>   | Homes |
| <i>Isoptericola</i>      | Homes |
| <i>Janibacter</i>        | Homes |
| <i>Jonquetella</i>       | Homes |
| <i>Kaistella</i>         | Homes |
| <i>Kaistia</i>           | Homes |
| <i>Kineosporia</i>       | Homes |
| <i>Kingella</i>          | Homes |
| <i>Klebsiella</i>        | Homes |
| <i>Knoellia</i>          | Homes |
| <i>Kurthia</i>           | Homes |
| <i>Kushneria</i>         | Homes |
| <i>Kytococcus</i>        | Homes |
| <i>Labrys</i>            | Homes |
| <i>Lampropedia</i>       | Homes |
| <i>Legionella</i>        | Homes |
| <i>Leptolyngbya</i>      | Homes |
| <i>Leptotrichia</i>      | Homes |
| <i>Leucobacter</i>       | Homes |
| <i>Luteimonas</i>        | Homes |

|                       |       |
|-----------------------|-------|
| <i>Luteolibacter</i>  | Homes |
| <i>Lutibacterium</i>  | Homes |
| <i>Lysinibacillus</i> | Homes |
| <i>Lysobacter</i>     | Homes |
| <i>Macrococcus</i>    | Homes |
| <i>Marinomonas</i>    | Homes |
| <i>Marmoricola</i>    | Homes |
| <i>Massilia</i>       | Homes |

|                        |       |
|------------------------|-------|
| <i>Mesorhizobium</i>   | Homes |
| <i>Methylophilus</i>   | Homes |
| <i>Methylosinus</i>    | Homes |
| <i>Microbacterium</i>  | Homes |
| <i>Microbispora</i>    | Homes |
| <i>Microcella</i>      | Homes |
| <i>Microcystis</i>     | Homes |
| <i>Micromonospora</i>  | Homes |
| <i>Morganella</i>      | Homes |
| <i>Mycoplana</i>       | Homes |
| <i>Mycoplasma</i>      | Homes |
| <i>Myroides</i>        | Homes |
| <i>Nannocystis</i>     | Homes |
| <i>Nevskia</i>         | Homes |
| <i>Nocardia</i>        | Homes |
| <i>Nocardioides</i>    | Homes |
| <i>Nocardiopsis</i>    | Homes |
| <i>Nonomuraea</i>      | Homes |
| <i>Nostoc</i>          | Homes |
| <i>Oceanobacillus</i>  | Homes |
| <i>Oceanospirillum</i> | Homes |
| <i>Ochrobactrum</i>    | Homes |
| <i>Oerskovia</i>       | Homes |
| <i>Opitutus</i>        | Homes |
| <i>Oribacterium</i>    | Homes |
| <i>Paenibacillus</i>   | Homes |
| <i>Pantoea</i>         | Homes |
| <i>Patulibacter</i>    | Homes |
| <i>Pedomicrobium</i>   | Homes |
| <i>Phormidium</i>      | Homes |
| <i>Phycococcus</i>     | Homes |
| <i>Phyllobacterium</i> | Homes |
| <i>Pigmentiphaga</i>   | Homes |
| <i>Pimelobacter</i>    | Homes |
| <i>Pirellula</i>       | Homes |
| <i>Planomicrobium</i>  | Homes |
| <i>Pontibacter</i>     | Homes |
| <i>Prauserella</i>     | Homes |
| <i>Prochlorococcus</i> | Homes |

|                          |       |
|--------------------------|-------|
| <i>Promicromonospora</i> | Homes |
|--------------------------|-------|

|                          |       |
|--------------------------|-------|
| <i>Prosthecobacter</i>   | Homes |
| <i>Proteus</i>           | Homes |
| <i>Providencia</i>       | Homes |
| <i>Pseudoclavibacter</i> | Homes |
| <i>Psychromonas</i>      | Homes |
| <i>Pullulanibacillus</i> | Homes |
| <i>Ramlibacter</i>       | Homes |
| <i>Renibacterium</i>     | Homes |
| <i>Rhodanobacter</i>     | Homes |
| <i>Rhodobaca</i>         | Homes |
| <i>Rhodocyclus</i>       | Homes |
| <i>Rhodoferax</i>        | Homes |
| <i>Rhodopseudomonas</i>  | Homes |
| <i>Rickettsia</i>        | Homes |
| <i>Rickettsiella</i>     | Homes |
| <i>Roseateles</i>        | Homes |
| <i>Roseomonas</i>        | Homes |
| <i>Rummeliibacillus</i>  | Homes |
| <i>Saccharopolyspora</i> | Homes |
| <i>Sediminibacterium</i> | Homes |
| <i>Selenomonas</i>       | Homes |
| <i>Serinicoccus</i>      | Homes |
| <i>Shinella</i>          | Homes |
| <i>Simonsiella</i>       | Homes |
| <i>Sinomonas</i>         | Homes |
| <i>Sneathia</i>          | Homes |
| <i>Solibacillus</i>      | Homes |
| <i>Solimonas</i>         | Homes |
| <i>Sphaerotilus</i>      | Homes |
| <i>Spiroplasma</i>       | Homes |
| <i>Spongiibacter</i>     | Homes |
| <i>Stenotrophomonas</i>  | Homes |
| <i>Steroidobacter</i>    | Homes |
| <i>Stigmatella</i>       | Homes |
| <i>Tannerella</i>        | Homes |
| <i>Terracoccus</i>       | Homes |
| <i>Terriglobus</i>       | Homes |
| <i>Tetrasphaera</i>      | Homes |
| <i>Thioclava</i>         | Homes |
| <i>Treponema</i>         | Homes |
| <i>Tropheryma</i>        | Homes |



|                        |       |
|------------------------|-------|
| <i>Turcibacter</i>     | Homes |
| <i>Vagococcus</i>      | Homes |
| <i>Vibrio</i>          | Homes |
| <i>Virgisporangium</i> | Homes |
| <i>Williamsia</i>      | Homes |

|                     |       |
|---------------------|-------|
| <i>Wolbachia</i>    | Homes |
| <i>Wolinella</i>    | Homes |
| <i>Xanthobacter</i> | Homes |
| <i>Xanthomonas</i>  | Homes |
| <i>Xenophilus</i>   | Homes |
| <i>Yonghaparkia</i> | Homes |

e habitats
